# Supplementary material
Source: Springer Nature journal article supplement (https://www.springermedizin.de/resource/supplementary/12936_2010_1298_MOESM5_ESM.pdf/9549438)

# Rationing vs. MFT

Risk of Fever per new Infection

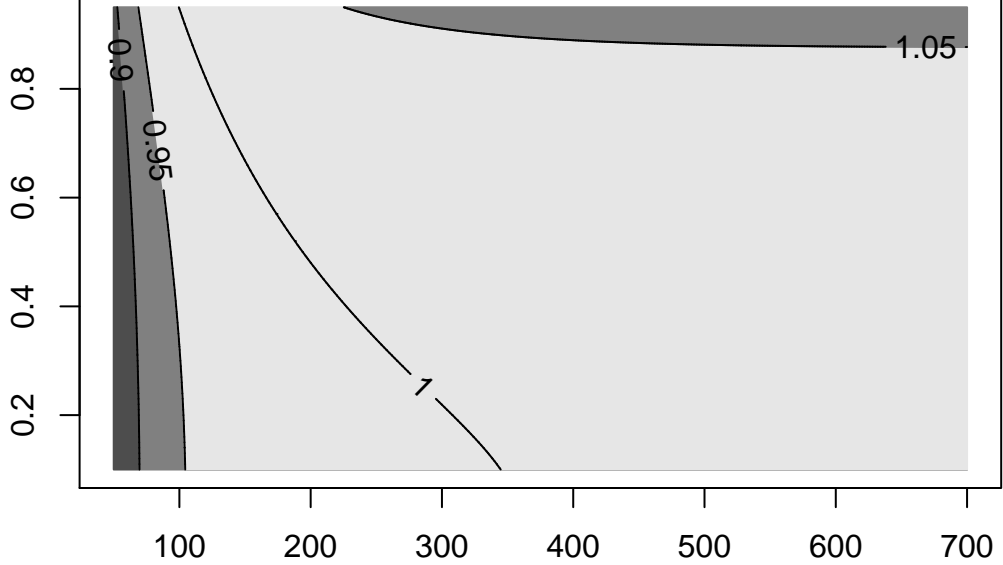

Waiting Time to Any Fever

Supplement: MOESM5 [file 9549438]
